# Supplementary material
Source: publisher figshare collection journal article supplement (https://future-science-group.figshare.com/ndownloader/files/35258758)
Supplement: Supplementary file 1 [file 35258758]

**Supplemental Appendix 1. ICD-10 Codes**

| **Category** | **ICD-10** | **Description** |
| --- | --- | --- |
| Explicit | A02.1-A02.9 | Salmonella sepsis |
| A20.7-A20.9 | Septicemic plague |
| A21.7-A21.9 | Generalized tularemia |
| A22.7-A22.9 | Anthrax sepsis |
| A24.1-A24.9 | Acute and fulminating melioidosis |
| A26.7-A26.9 | Erysipelothrix sepsis |
| A28.2-A28.9 | Extraintestinal yersiniosis |
| A32.7-A32.9 | Listerial sepsis |
| A39 | Meningococcal infection |
| A39.0 | Meningococcal meningitis |
| A39.4-A41.9 | Meningococcemia, unspecified |
| A42.7-A42.9 | Actinomycotic sepsis |
| A50-A50.9 | Congenital syphilis |
| A54.86 | Gonococcal sepsis |
| B00.7-B00.9 | Disseminated herpesviral disease |
| B37.7-B37.9 | Candidal sepsis |
| N98 | Complications associated with artificial fertilization |
| N98.0 | Infection associated with artificial insemination |
| O03 | Spontaneous abortion |
| O03.0 | Genitl trct and pelvic infection fol incmpl spon abortion |
| O03.38 | Urinary tract infection following incomplete spon abortion |
| O03.5 | Genitl trct and pelvic infct fol complete or unsp spon abort |
| O03.88 | Urinary tract infection fol complete or unsp spon abortion |
| O04.5 | Genitl trct and pelvic infct fol (induced) term of pregnancy |
| O04.88 | Urinary tract infection fol (induced) term of pregnancy |
| O07.38 | Urinary tract infection fol failed attempt term of pregnancy |
| O08 | Complications following ectopic and molar pregnancy |
| O08.0 | Genitl trct and pelvic infct fol ectopic and molar pregnancy |
| O08.83 | Urinary tract infection fol an ectopic and molar pregnancy |
| O23-O23.93 | Infections of genitourinary tract in pregnancy |
| O41.1-O41.93 | Infection of amniotic sac and membranes |
| O41.93X | Disorder of amnio fluid and membrns, unsp, third tri, unsp |
| O75.3 | Other infection during labor |
| O85-O86.89 | Puerperal sepsis |
| O88.3-O88.32 | Obstetric pyemic and septic embolism |
| O91-O91.23 | Infect of breast assoc w pregnancy, the puerp and lactation |
| O98 | Matern infec/parastc dis classd elsw but compl preg/chldbrth |
| O98.2-O98.93 | Gonorrhea compl preg/chldbrth |
| P00.2 | Newborn affected by maternal infec/parastc diseases |
| P22-P23.9 | Respiratory distress of newborn |
| P29.12 | Neonatal bradycardia |
| P29.81 | Cardiac arrest of newborn |
| P35-P37 | Congenital viral diseases |
| P37.1-P39.9 | Congenital toxoplasmosis |
| R65.2-R65.21 | Severe sepsis |
| R68.13 | Apparent life threatening event in infant (ALTE) |
| Infection | A01-A02.0 | Typhoid and paratyphoid fevers |
| A03-A09.9 | Shigellosis |
| A19-A20.3 | Miliary tuberculosis |
| A21-A21.3 | Tularemia |
| A22-A22.2 | Anthrax |
| A23-A24.0 | Brucellosis |
| A25-A26.0 | Rat-bite fevers |
| A27-A28.1 | Leptospirosis |
| A31-A32.12 | Infection due to other mycobacteria |
| A36-A39 | Diphtheria |
| A39.1-A39.3 | Meningococcal meningitis |
| A42-A42.2 | Actinomycosis |
| A43-A46.0 | Nocardiosis |
| A48-A49.9 | Other bacterial diseases, not elsewhere classified |
| A59-A59.9 | Trichomoniasis |
| A65-A65.0 | Nonvenereal syphilis |
| A69-A69.1 | Other spirochetal infections |
| A74 | Other diseases caused by chlamydiae |
| A74.8-A75.9 | Other chlamydial diseases |
| A740 | Chlamydial conjunctivitis |
| A77-A81.9 | Spotted fever [tick-borne rickettsioses] |
| A83-A96.9 | Mosquito-borne viral encephalitis |
| A98-B00.59 | Other viral hemorrhagic fevers, not elsewhere classified |
| B01-B10.89 | Varicella [chickenpox] |
| B25-B27.99 | Cytomegaloviral disease |
| B29.4 |  |
| B33-B34.9 | Other viral diseases, not elsewhere classified |
| B37-B37.6 | Candidiasis |
| B38-B50.9 | Coccidioidomycosis |
| B54-B55 | Unspecified malaria |
| B55.1-B55.9 | Cutaneous leishmaniasis |
| B550 | Visceral leishmaniasis |
| B58-B60.8 | Toxoplasmosis |
| B64 | Unspecified protozoal disease |
| B67-B67.99 | Echinococcosis |
| B91 | Sequelae of poliomyelitis |
| B95-B99.9 | Strep as the cause of diseases classified elsewhere |
| G00-G08.0 | Bacterial meningitis, not elsewhere classified |
| G14-G14.6 | Postpolio syndrome |
| H05.01-H05.039 | Cellulitis of orbit |
| H60.2-H60.23 | Malignant otitis externa |
| H70.0-H70.009 | Mastoiditis and related conditions |
| I00 | Rheumatic fever without heart involvement |
| I02 | Rheumatic chorea |
| I02.9 | Rheumatic chorea without heart involvement |
| I26.01-I26.09 | Septic pulmonary embolism with acute cor pulmonale |
| I26.90-I26.99 | Pulmonary embolism without acute cor pulmonale |
| I33-I33.9 | Acute and subacute endocarditis |
| I38-I39.9 | Endocarditis, valve unspecified |
| I40.0-I40.9 | Acute myocarditis |
| I76 | Septic arterial embolism |
| I96-I96.9 | Gangrene, not elsewhere classified |
| I98.1 | Cardiovascular disorders in other infectious and parasitic diseases classified elsewhere |
| J01-J06.9 | Acute sinusitis |
| J09-J22.9 | Influenza due to certain identified influenza viruses |
| J36-J36.0 | Peritonsillar abscess |
| J39.0-J39.1 | Other diseases of upper respiratory tract |
| J85-J86.9 | Abscess of lung and mediastinum |
| K35-K37.9 | Acute appendicitis |
| K57-K57.93 | Diverticular disease of intestine |
| K61-K61.4 | Abscess of anal and rectal regions |
| K63.0-K63.1 | Other diseases of intestine |
| K65-K65.9 | Peritonitis |
| K67.8 | Disorders of peritoneum in infectious diseases classified elsewhere |
| K75.0-K75.1 | Other inflammatory liver diseases |
| K75.3 | Granulomatous hepatitis, not elsewhere classified |
| K76.3 | Infarction of liver |
| K77.0 | Liver disorders in diseases classified elsewhere |
| K81.0 | Cholecystitis |
| K81.2 | Acute cholecystitis with chronic cholecystitis |
| K83.0 | Other diseases of biliary tract |
| K95.01 | Infection due to gastric band procedure |
| K95.81 | Infection due to other bariatric procedure |
| L02-L08.9 | Cutaneous abscess, furuncle and carbuncle |
| M00-M02.9 | Pyogenic arthritis |
| M86-M86.9 | Osteomyelitis |
| M89.6-M89.69 | Osteopathy after poliomyelitis |
| N10-N10.9 | Acute pyelonephritis |
| N15.1-N15.9 | Renal and perinephric abscess |
| N30-N30.91 | Cystitis |
| N39.0 | Other disorders of urinary system |
| N41.0 | Inflammatory diseases of prostate |
| N41.2-N41.3 | Abscess of prostate |
| N45-N45.9 | Orchitis and epididymitis |
| N70-N77.8 | Salpingitis and oophoritis |
| R78.81 | Bacteremia |
| T80.2-T80.29 | Infect following infusion, transfuse and theraputc injection |
| T81.4 | Infection following a procedure |
| T82.6-T82.7 | Infect/inflm reaction due to cardiac valve prosthesis |
| T83.5 | Infect/inflm reaction due to prosth dev/grft in urinry sys |
| T83.6 | Infect/inflm reaction due to prosth dev/grft in genitl trct |
| T84.5-T84.7 | Infect/inflm reaction due to internal joint prosthesis |
| T85.7 | Infect/inflm reaction due to oth internal prosth dev/grft |
| T88.0 | Oth complications of surgical and medical care, NEC |
| U04 | Severe acute respiratory syndrome [SARS] |
| Organ dysfunction | D65-D65.9 | Disseminated intravascular coagulation |
| D69.5-D69.59 | Secondary thrombocytopenia |
| E87.2-E87.99 | Acidosis |
| G93.4-G93.49 | Other and unspecified encephalopathy |
| I46-I46.9 | Cardiac arrest |
| I95.1-I95.9 | Orthostatic hypotension |
| J80-J80.9 | Acute respiratory distress syndrome |
| J95.2-J95.3 | Acute pulmonary insufficiency following nonthoracic surgery |
| J96-J96.92 | Respiratory failure, not elsewhere classified |
| K72-K72.91 | Hepatic failure, not elsewhere classified |
| N00-N01.9 | Acute nephritic syndrome |
| N17-N17.9 | Acute kidney failure |
| R09.02 | Hypoxemia |
| R09.2 | Respiratory arrest |
| R40.0-R40.4 | Somnolence |
| R41.82 | Altered mental status, unspecified |
| R55-R55.0 | Syncope and collapse |
| R57-R57.9 | Shock, not elsewhere classified |
